# Supplementary material for: Detection of CYP2C19 Genetic Variants in Malaysian Orang Asli from Massively Parallel Sequencing Data
Source: PLoS One. 2016 Oct 31;11(10):e0164169. doi: 10.1371/journal.pone.0164169 (PMC5087908; doi:10.1371/journal.pone.0164169)
Supplement: S1 Table — (XLSX) [file pone.0164169.s001.xlsx]

## Sheet: Sheet1
S1 Table. Positions and frequencies of CYP2C19 genetic variants in Orang Asli.
No.	Position	Name	Region	Amino acid substitution	HWpval	MAF	Nucleotides	Allele
1	-4837	rs141265416	5'	⁄	0.2339	0.105	C:A
2	-4828	rs150786069	5'	⁄	1	0.048	G:C
3	-4622	novel	5'	⁄	1	0.024	C:T
4	-4554	rs7919615	5'	⁄	3.01e-18	0.387	A:G
5	-4504	rs7919698	5'	⁄	0.0066	0.185	A:G
6	-4194	rs143319758	5'	⁄	0.006	0.048	A:G
7	-3758	rs74152364	5'	⁄	0.0055	0.153	C:T
8	-3619	rs78721914	5'	⁄	0.006	0.156	A:G
9	-3402	rs11188072	5'	⁄	1	0.024	C:T
10	-3332	rs7101258	5'	⁄	0.0139	0.056	A:C
11	-3331	rs78742448	5'	⁄	0.3106	0.113	C:T
12	-3329	rs78535200	5'	⁄	0.2339	0.105	G:T
13	-3266	rs4532967	5'	⁄	1	0.024	G:T
14	-3219	rs77046614	5'	⁄	0.0777	0.081	T:G
15	-3021	rs755488172	5'	⁄	1	0.008	A:G
16	-2772	rs77957608	5'	⁄	0.3106	0.113	G:A
17	-2720	rs77850210	5'	⁄	0.2339	0.105	T:C
18	-1670	novel.1	5'	⁄	1	0.008	A:G
19	-1418	rs3814637	5'	⁄	0.0055	0.153	C:T
20	-952	novel.2	5'	⁄	1	0.008	T:C
21	-889	rs11568732	5'	⁄	0.0013	0.137	T:G
22	-806	rs12248560	5'	⁄	1	0.048	C:T	CYP2C19*17
23	-98	rs4986894	5'	⁄	1	0.032	T:C
24	99	rs17885098	Exon 1	⁄	0.0034	0.177	T:C
25	527	rs7918461	Intron 1	⁄	1	0.048	A:T
26	583	rs10509676	Intron 1	⁄	1	0.073	A:T
27	608	rs17882547	Intron 1	⁄	1	0.056	G:A
28	609	rs17884974	Intron 1	⁄	1	0.056	C:T
29	611	rs17882066	Intron 1	⁄	1	0.065	G:A
30	621	rs12773342	Intron 1	⁄	1	0.065	T:C
31	940	rs17879263	Intron 1	⁄	0.0055	0.153	G:A
32	1423	rs138737109	Intron 1	⁄	1	0.032	C:T
33	1933	rs58667319	Intron 1	⁄	0.0013	0.137	C:T
34	2276	rs531576956	Intron 1	⁄	1	0.008	A:T
35	2340	rs117087942	Intron 1	⁄	0.0777	0.081	T:A
36	2838	rs111579015	Intron 1	⁄	0.0013	0.137	G:C
37	3074	rs11188075	Intron 1	⁄	3.01e-18	0.387	G:A
38	3403	rs12768009	Intron 1	⁄	0.0073	0.089	G:A
39	3647	rs35442644	Intron 1	⁄	1	0.024	G:A
40	3925	rs146568893	Intron 1	⁄	0.006	0.048	G:A
41	4069	rs112773738	Intron 1	⁄	0.0028	0.145	A:C
42	4676	rs4396216	Intron 1	⁄	3.01e-18	0.387	A:C
43	4872	rs11596777	Intron 1	⁄	1	0.032	C:A
44	4922	rs59826872	Intron 1	⁄	0.0055	0.153	G:C
45	5180	rs35751085	Intron 1	⁄	1	0.048	G:A
46	5260	rs11597292	Intron 1	⁄	0.0091	0.218	C:G
47	5746	rs11528085	Intron 1	⁄	0.7645	0.121	G:A
48	5968	rs57957726	Intron 1	⁄	0.0055	0.153	T:C
49	6222	rs12572917	Intron 1	⁄	1	0.032	G:T
50	6350	rs71482318	Intron 1	⁄	1	0.065	A:T
51	7082	rs117395468	Intron 1	⁄	0.0013	0.137	T:C
52	7450	rs10082434	Intron 1	⁄	3.01e-18	0.387	A:G
53	7672	rs138318879	Intron 1	⁄	0.006	0.048	G:A
54	7798	rs75539551	Intron 1	⁄	0.0181	0.169	T:C
55	7902	rs373506958	Intron 1	⁄	1	0.008	C:A
56	8035	rs146058526	Intron 1	⁄	0.2339	0.105	A:G
57	8042	rs4414147	Intron 1	⁄	0.1606	0.04	A:G
58	8342	rs574336735	Intron 1	⁄	0.4275	0.065	C:T
59	8343	rs181820390	Intron 1	⁄	1	0.008	G:A
60	8409	rs116908887	Intron 1	⁄	0.006	0.048	G:A
61	8515	rs11528086	Intron 1	⁄	1	0.073	G:A
62	8625	rs186508071	Intron 1	⁄	1	0.008	C:T
63	8798	rs112543932	Intron 1	⁄	0.0055	0.153	T:G
64	8907	rs150991980	Intron 1	⁄	0.0181	0.169	T:G
65	9136	rs146936435	Intron 1	⁄	0.0055	0.153	C:T
66	9360	rs117989517	Intron 1	⁄	0.006	0.048	C:T
67	9611	rs111789203	Intron 1	⁄	0.1179	0.089	T:C
68	9899	rs11188070	Intron 1	⁄	1	0.008	C:A
69	10083	rs4291603	Intron 1	⁄	0.0025	0.202	G:T
70	10145	rs4501922	Intron 1	⁄	0.0003	0.153	T:C
71	10177	rs188907790	Intron 1	⁄	0.0028	0.145	T:C
72	10226	rs4447102	Intron 1	⁄	1	0.032	G:A
73	10366	rs138202500	Intron 1	⁄	0.0139	0.056	G:A
74	10468	rs61249521	Intron 1	⁄	0.0055	0.153	G:A
75	10588	rs4277036	Intron 1	⁄	0.0012	0.194	A:T
76	10711	rs112732395	Intron 1	⁄	0.2339	0.105	C:T
77	10761	Novel	Intron 1	⁄	1	0.04	A:G
78	11125	rs114121665	Intron 1	⁄	0.0181	0.169	T:C
79	11305	rs60214908	Intron 1	⁄	0.0034	0.177	A:G
80	11581	rs55805503	Intron 1	⁄	0.0028	0.145	T:A
81	11772	rs17885348	Intron 1	⁄	0.1697	0.097	A:G
82	11801	rs6583954	Intron 1	⁄	1	0.056	C:T
83	12013	rs17884832	Intron 1	⁄	0.0028	0.145	T:G
84	12122	rs7916649	Intron 1	⁄	0.0049	0.21	G:A
85	12306	rs17878649	Intron 1	⁄	0.006	0.048	G:A
86	12662	rs12769205	Intron 2	⁄	1	0.056	A:G	CYP2C19*35
87	13166	rs17879992	Intron 3	⁄	0.0181	0.169	T:C
88	13281	rs4244284	Intron 3	⁄	0.0141	0.25	A:G
89	13533	novel.3	Intron 3	⁄	1	0.016	A:G
90	13594	rs4388808	Intron 3	⁄	0.012	0.194	A:G
91	13765	rs12778026	Intron 3	⁄	1	0.056	T:A
92	13993	rs7086313	Intron 3	⁄	1	0.024	T:A
93	14246	rs7068577	Intron 3	⁄	1	0.048	C:T
94	14527	rs114568171	Intron 3	⁄	1	0.056	T:C
95	14927	rs4362080	Intron 3	⁄	0.0049	0.21	A:G
96	15268	rs185901812	Intron 3	⁄	1	0.016	A:C
97	15887	rs372150082	Intron 3	⁄	0.3275	0.056	G:A
98	16131	Novel.1	Intron 3	⁄	1	0.008	T:C
99	16175	Novel.2	Intron 3	⁄	1	0.008	C:T
100	16177	rs148600337	Intron 3	⁄	1	0.008	C:G
101	16252	rs7919524	Intron 3	⁄	1	0.089	T:A
102	16389	rs7078494	Intron 3	⁄	0.0139	0.056	C:T
103	16682	rs17878673	Intron 3	⁄	0.0028	0.145	A:G
104	17830	rs61311738	Exon 4	A173V	1	0.008	C:T
105	17948	rs4986893	Exon 4	W212X	0.0273	0.065	G:A	CYP2C19*3
106	18427	rs4304697	Intron 4	⁄	0.0486	0.185	G:A
107	18911	rs7088784	Intron 4	⁄	0.0303	0.177	A:G
108	18964	rs368040759	Intron 4	⁄	1	0.008	A:G
109	19154	rs4244285	exon 5	⁄	1	0.056	G:A	CYP2C19*2
110	19520	rs12571421	Intron 5	⁄	1	0.032	A:G
111	19797	Novel.3	Intron 5	⁄	1	0.008	T:A
112	19810	Novel.4	Intron 5	⁄	1	0.008	G:C
113	19878	rs143138959	Intron 5	⁄	1	0.008	C:G
114	20132	rs67482845	Intron 5	⁄	0.0066	0.185	C:T
115	20148	Novel.5	Intron 5	⁄	1	0.008	A:G
116	20227	rs116409382	Intron 5	⁄	0.0486	0.185	A:G
117	20839	rs542340772	Intron 5	⁄	1	0.008	T:G
118	21291	rs80259168	Intron 5	⁄	0.3106	0.113	C:G
119	21361	rs35390752	Intron 5	⁄	1	0.056	T:G
120	22003	rs7081559	Intron 5	⁄	1	0.04	G:A
121	22265	rs7081643	Intron 5	⁄	1	0.04	C:G
122	22353	rs75374791	Intron 5	⁄	0.0017	0.169	T:C
123	22518	rs57584668	Intron 5	⁄	0.0034	0.177	C:T
124	23013	rs79103432	Intron 5	⁄	0.2339	0.105	C:T
125	23170	rs113089853	Intron 5	⁄	0.1179	0.089	C:T
126	23276	rs12247175	Intron 5	⁄	1	0.024	C:T
127	23558	rs77419080	Intron 5	⁄	0.2339	0.105	T:A
128	23653	rs114537694	Intron 5	⁄	5.2e-06	0.097	A:T
129	23784	rs77921213	Intron 5	⁄	0.2339	0.105	G:T
130	24235	rs74636383	Intron 5	⁄	0.1697	0.097	A:C
131	24682	rs561711147	Intron 5	⁄	1	0.008	G:A
132	24750	Novel.6	Intron 5	⁄	1	0.008	T:C
133	24894	rs61153799	Intron 5	⁄	0.0103	0.161	T:A
134	25001	rs12767583	Intron 5	⁄	1	0.065	C:T
135	25274	rs112573749	Intron 5	⁄	0.2339	0.105	T:A
136	25574	rs77680777	Intron 5	⁄	0.006	0.048	G:T
137	25854	rs67120915	Intron 5	⁄	1	0.073	T:C
138	25959	rs200841794	Intron 5	⁄	1	0.008	C:A
139	26028	rs57822910	Intron 5	⁄	0.0055	0.153	C:T
140	26513	Novel.7	Intron 5	⁄	1	0.008	A:G
141	26524	Novel.8	Intron 5	⁄	1	0.008	T:A
142	27024	rs78397134	Intron 5	⁄	0.0066	0.185	C:T
143	27313	rs145950182	Intron 5	⁄	0.048	0.073	G:A
144	27397	rs148214119	Intron 5	⁄	0.0181	0.169	A:T
145	27420	rs202060631	Intron 5	⁄	1	0	T:T
146	27615	rs9663112	Intron 5	⁄	0.0181	0.169	A:T
147	27881	rs796090014	Intron 5	⁄	1	0.008	A:G
148	28132	Novel.9	Intron 5	⁄	1	0.008	T:G
149	28167	Novel.10	Intron 5	⁄	1	0.008	A:G
150	28177	Novel.11	Intron 5	⁄	1	0.008	C:T
151	28189	Novel.12	Intron 5	⁄	1	0.008	A:G
152	28376	rs377073701	Intron 5	⁄	1	0.024	C:T
153	28457	rs145340760	Intron 5	⁄	0.2339	0.105	T:A
154	28628	rs7076898	Intron 5	⁄	0.0055	0.153	A:G
155	28630	rs7077029	Intron 5	⁄	0.0055	0.153	C:T
156	28754	rs145470094	Intron 5	⁄	0.2339	0.105	G:C
157	28790	rs145364562	Intron 5	⁄	1	0.056	G:T
158	29013	rs141144882	Intron 5	⁄	0.1697	0.097	G:A
159	29183	Novel.13	Intron 5	⁄	1	0.048	G:C
160	29725	rs183590790	Intron 5	⁄	0.2339	0.105	C:T
161	29726	rs77819408	Intron 5	⁄	0.0103	0.161	T:A
162	29847	rs12268235	Intron 5	⁄	1	0.024	G:T
163	29865	rs114931426	Intron 5	⁄	0.0055	0.153	A:G
164	29914	rs760364196	Intron 5	⁄	1	0.008	A:G
165	30320	rs145760869	Intron 5	⁄	0.0025	0.202	A:C
166	31037	rs58349349	Intron 5	⁄	0.0103	0.161	G:C
167	31058	rs117381226	Intron 5	⁄	0.0055	0.153	G:A
168	31115	rs113641915	Intron 5	⁄	0.1697	0.097	A:G
169	31227	rs111853758	Intron 5	⁄	0.0055	0.153	T:G
170	31291	rs191991016	Intron 5	⁄	0.1697	0.097	G:A
171	31296	rs57079861	Intron 5	⁄	0.0028	0.145	T:G
172	31423	rs9663206	Intron 5	⁄	0.006	0.048	C:T
173	31456	rs117716164	Intron 5	⁄	0.3106	0.113	C:T
174	31587	rs9663214	Intron 5	⁄	0.0055	0.153	C:G
175	31826	rs9664361	Intron 5	⁄	0.0049	0.21	A:T
176	31954	rs9664368	Intron 5	⁄	1.38e-18	0.419	A:G
177	32309	rs112038911	Intron 5	⁄	0.1697	0.097	T:C
178	32599	rs11498699	Intron 5	⁄	1	0.024	T:G
179	32658	rs150069858	Intron 5	⁄	1	0.04	A:G
180	32781	rs11498522	Intron 5	⁄	1	0.024	C:A
181	32854	rs144376681	Intron 5	⁄	0.0055	0.153	T:G
182	32985	rs148801468	Intron 5	⁄	0.0055	0.153	A:G
183	33127	rs11498523	Intron 5	⁄	1	0.048	C:G
184	33248	Novel.14	Intron 5	⁄	1	0.008	A:G
185	33284	rs765346398	Intron 5	⁄	1	0.008	T:G
186	33307	Novel.15	Intron 5	⁄	1	0.016	A:G
187	33854	rs139619180	Intron 5	⁄	0.0747	0.194	G:A
188	33942	Novel.16	Intron 5	⁄	1	0.008	A:T
189	33949	rs778281658	Intron 5	⁄	1	0.008	G:A
190	34076	rs561637112	Intron 5	⁄	1	0.008	T:A
191	34209	rs113036428	Intron 5	⁄	0.0055	0.153	T:A
192	34347	rs145597907	Intron 5	⁄	0.0139	0.056	G:A
193	34392	rs11498700	Intron 5	⁄	0.0547	0.218	T:G
194	34420	rs559807925	Intron 5	⁄	1	0.008	C:G
195	34421	rs528824398	Intron 5	⁄	1	0.008	A:G
196	34431	rs528824398.1	Intron 5	⁄	1	0.008	A:G
197	34646	rs9783199	Intron 5	⁄	3.01e-18	0.387	T:C
198	34750	rs116855710	Intron 5	⁄	0.002	0.04	G:T
199	34874	rs11528087	Intron 5	⁄	0.6593	0.129	G:T
200	35475	Novel.17	Intron 5	⁄	1	0.008	A:G
201	35484	Novel.18	Intron 5	⁄	1	0.008	C:T
202	35487	Novel.19	Intron 5	⁄	1	0.008	G:C
203	35817	rs9630086	Intron 5	⁄	1	0.032	C:G
204	36134	Novel.20	Intron 5	⁄	1	0.008	G:T
205	36135	Novel.21	Intron 5	⁄	1	0.008	C:T
206	36137	Novel.22	Intron 5	⁄	1	0.008	G:T
207	36139	rs779690578	Intron 5	⁄	1	0.008	C:T
208	36141	Novel.23	Intron 5	⁄	1	0.008	A:T
209	36279	Novel.24	Intron 5	⁄	1	0.008	G:A
210	36312	rs377538047	Intron 5	⁄	1	0.008	T:G
211	36550	Novel.25	Intron 5	⁄	1	0.008	T:C
212	36837	rs142764961	Intron 5	⁄	0.0139	0.056	T:A
213	37767	rs369611873	Intron 5	⁄	1	0.016	C:T
214	37824	rs118174575	Intron 5	⁄	0.0139	0.056	A:G
215	38025	rs78497745	Intron 5	⁄	0.0034	0.177	T:C
216	38156	rs77460358	Intron 5	⁄	0.0103	0.161	T:G
217	38233	rs79187906	Intron 5	⁄	0.0028	0.145	A:G
218	38449	rs75254631	Intron 5	⁄	0.1697	0.097	C:T
219	38574	rs56229007	Intron 5	⁄	1	0.048	T:A
220	38627	rs116897631	Intron 5	⁄	0.006	0.048	G:A
221	38806	rs144218639	Intron 5	⁄	1	0.008	G:A
222	38814	Novel.26	Intron 5	⁄	1	0.008	A:G
223	38823	Novel.27	Intron 5	⁄	1	0.008	A:G
224	38826	Novel.28	Intron 5	⁄	1	0.008	C:A
225	38834	Novel.29	Intron 5	⁄	1	0.008	T:G
226	38874	Novel.30	Intron 5	⁄	1	0.008	A:G
227	38908	rs760124746	Intron 5	⁄	1	0.008	A:G
228	38911	Novel.31	Intron 5	⁄	1	0.008	C:G
229	39063	rs7911008	Intron 5	⁄	1	0.048	A:G
230	39145	rs192331600	Intron 5	⁄	1	0.016	G:A
231	39149	rs12218223	Intron 5	⁄	1	0.097	G:A
232	39526	rs113546720	Intron 5	⁄	0.2339	0.105	G:A
233	40020	rs149389362	Intron 5	⁄	0.0103	0.161	T:C
234	41295	rs4494250	Intron 5	⁄	0.0972	0.032	G:A
235	42110	rs2104161	Intron 5	⁄	0.04	0.266	G:T
236	42369	rs80239056	Intron 5	⁄	0.006	0.048	A:G
237	42689	rs78779059	Intron 5	⁄	0.0303	0.177	A:C
238	42716	rs12221433	Intron 5	⁄	0.9922	0.105	A:C
239	42901	Novel.32	Intron 5	⁄	1	0.024	G:A
240	43066	rs115259717	Intron 5	⁄	0.0273	0.065	T:A
241	43583	rs80336387	Intron 5	⁄	0.0139	0.056	G:T
242	43951	rs34121168	Intron 5	⁄	1	0.048	G:A
243	44150	rs75665761	Intron 5	⁄	0.0001	0.056	G:A
244	44236	rs74804603	Intron 5	⁄	0.048	0.073	A:G
245	44317	rs77635509	Intron 5	⁄	0.0777	0.081	T:G
246	44427	rs12772672	Intron 5	⁄	1	0.056	A:G
247	44924	rs4641393	Intron 5	⁄	1	0.048	C:T
248	45138	rs116057320	Intron 5	⁄	0.0014	0.073	T:C
249	45573	rs11188082	Intron 5	⁄	1.35e-08	0.274	A:T
250	46298	rs76757784	Intron 5	⁄	0.0005	0.065	C:T
251	46464	rs11597811	Intron 5	⁄	1	0.04	G:A
252	46991	rs7091883	Intron 5	⁄	1	0.032	G:C
253	47027	rs2224566	Intron 5	⁄	0.0004	0.258	A:T
254	47365	rs112859410	Intron 5	⁄	0.0777	0.081	C:T
255	47467	rs35476215	Intron 5	⁄	0.3994	0.121	G:A
256	47677	rs143814980	Intron 5	⁄	1	0.056	G:A
257	47804	Novel.33	Intron 5	⁄	1	0.008	A:T
258	48018	rs183606065	Intron 5	⁄	0.0073	0.089	A:C
259	48031	rs56061138	Intron 5	⁄	0.0014	0.073	C:A
260	48039	rs113018075	Intron 5	⁄	0.048	0.073	A:T
261	48047	rs184377978	Intron 5	⁄	0.0273	0.065	G:T
262	48147	rs142348331	Intron 5	⁄	0.0005	0.065	A:G
263	48737	rs112616341	Intron 5	⁄	0.0028	0.145	A:C
264	49081	rs2264938	Intron 5	⁄	0.3275	0.056	A:G
265	49102	Novel.34	Intron 5	⁄	1	0.008	T:C
266	49469	rs12572085	Intron 5	⁄	1	0.048	C:T
267	49498	Novel.35	Intron 5	⁄	1	0.008	C:G
268	49740	rs372552944	Intron 5	⁄	0.0488	0.024	C:T
269	50218	rs768223353	Intron 5	⁄	1	0.008	C:T
270	50249	rs201406496	Intron 5	⁄	0.1606	0.04	G:T
271	50413	Novel.36	Intron 5	⁄	0.0972	0.032	C:G
272	50565	rs79188926	Intron 5	⁄	0.0005	0.185	A:G
273	50934	rs117317596	Intron 5	⁄	0.048	0.073	C:G
274	51275	rs554671399	Intron 5	⁄	1	0.008	C:A
275	51285	rs200889969	Intron 5	⁄	1	0.04	C:T
276	51439	rs560769667	Intron 5	⁄	1	0.016	C:T
277	51564	rs567739410	Intron 5	⁄	1	0.008	G:A
278	51793	rs369628763	Intron 5	⁄	0.3275	0.056	C:T
279	52237	rs192040991	Intron 5	⁄	0.0273	0.065	C:T
280	52607	rs1853205	Intron 5	⁄	1	0.04	C:G
281	52780	rs1322179	Intron 5	⁄	1	0.056	C:T
282	52818	rs74152369	Intron 5	⁄	0.0028	0.145	A:G
283	52845	rs190777341	Intron 5	⁄	1	0.008	C:G
284	53320	rs7079533	Intron 5	⁄	0.0001	0.056	T:C
285	53535	Novel.37	Intron 5	⁄	1	0.016	C:T
286	53536	Novel.38	Intron 5	⁄	1	0.008	T:C
287	53539	Novel.39	Intron 5	⁄	1	0.032	C:T
288	53648	rs10509677	Intron 5	⁄	0.048	0.073	T:C
289	53728	rs10509678	Intron 5	⁄	0.048	0.073	A:C
290	53967	rs180818145	Intron 5	⁄	1	0.008	C:T
291	54128	rs201025552	Intron 5	⁄	0.002	0.04	G:A
292	54318	rs373322185	Intron 5	⁄	1	0.008	A:G
293	54323	rs11188085	Intron 5	⁄	5.2e-06	0.097	G:A
294	54508	Novel.40	Intron 5	⁄	1	0.008	C:T
295	54559	Novel.41	Intron 5	⁄	1	0.008	T:C
296	54644	rs112029676	Intron 5	⁄	0.0139	0.056	A:C
297	54942	rs61886228	Intron 5	⁄	3.31e-17	0.323	T:C
298	54961	rs371318163	Intron 5	⁄	0.0001	0.056	C:G
299	55047	rs61886229	Intron 5	⁄	4.94e-18	0.371	A:G
300	55265	rs367933184	Intron 5	⁄	0.002	0.04	G:A
301	55299	Novel.42	Intron 5	⁄	1	0.008	C:T
302	55327	rs199664979	Intron 5	⁄	0.002	0.04	A:G
303	55413	rs375299623	Intron 5	⁄	0.0488	0.024	T:C
304	55611	Novel.43	Intron 5	⁄	1	0.008	G:C
305	56115	rs61886230	Intron 5	⁄	1	0.008	A:G
306	56169	Novel.44	Intron 5	⁄	1	0.008	C:T
307	56509	rs553916163	Intron 5	⁄	1	0.008	A:T
308	56516	rs753727776	Intron 5	⁄	1	0.008	C:G
309	56828	Novel.45	Intron 5	⁄	1	0.008	C:T
310	57056	Novel.46	Intron 5	⁄	0.002	0.04	C:A
311	57148	rs200878867	Intron 5	⁄	0.0002	0.121	C:G
312	57602	rs55732648	Intron 5	⁄	0.1697	0.097	A:T
313	57678	rs28399511	Intron 5	⁄	0.2339	0.105	T:G
314	57740	rs4417205	Intron 5	⁄	1	0.056	C:G
315	58632	rs10786172	Intron 6	⁄	0.1606	0.04	A:G
316	59330	rs10748625	Intron 6	⁄	3.01e-18	0.387	G:T
317	59646	rs80147359	Intron 6	⁄	1	0.008	C:A
318	59694	rs12253253	Intron 6	⁄	1	0.04	A:C
319	59867	rs74497926	Intron 6	⁄	0.048	0.073	T:G
320	60452	rs75280500	Intron 6	⁄	0.3106	0.113	G:A
321	61166	rs1853209	Intron 6	⁄	3.01e-18	0.387	T:C
322	62058	rs80147359.1	Intron 6	⁄	1	0.008	G:A
323	62400	Novel.47	Intron 6	⁄	1	0.008	C:T
324	62783	Novel.48	Intron 6	⁄	1	0.008	A:G
325	63093	rs781682773	Intron 6	⁄	1	0.024	G:C
326	63631	rs566144525	Intron 6	⁄	0.006	0.048	A:T
327	63632	rs369281668	Intron 6	⁄	0.0139	0.056	T:G
328	64301	rs202034133	Intron 6	⁄	0.0139	0.056	T:G
329	64826	rs145513245	Intron 6	⁄	1	0.032	C:T
330	64827	rs151016280	Intron 6	⁄	0.001	0.218	G:A
331	65085	rs78373452	Intron 6	⁄	1	0.032	T:G
332	65169	rs78038798	Intron 6	⁄	1.97e-18	0.403	T:C
333	65289	rs199562446	Intron 6	⁄	0.012	0.194	C:T
334	65330	Novel.49	Intron 6	⁄	1	0.008	G:T
335	65667	rs373271444	Intron 6	⁄	2.22e-05	0.105	C:G
336	65720	rs370262109	Intron 6	⁄	0.002	0.04	C:G
337	65897	Novel.50	Intron 6	⁄	1	0.008	C:G
338	65919	rs140540533	Intron 6	⁄	4.41e-05	0.137	A:G
339	66130	rs375606759	Intron 6	⁄	0.0139	0.056	A:C
340	66193	rs367756748	Intron 6	⁄	0.0139	0.056	G:T
341	66349	rs139202257	Intron 6	⁄	0.1697	0.097	C:T
342	66462	Novel.51	Intron 6	⁄	1	0.04	T:A
343	66472	Novel.52	Intron 6	⁄	1	0.008	G:A
344	66673	rs370243296	Intron 6	⁄	1	0.008	A:T
345	66676	rs143215313	Intron 6	⁄	0.1179	0.089	C:G
346	66968	rs147528722	Intron 6	⁄	1	0.056	T:C
347	66982	rs373878033	Intron 6	⁄	0.0004	0.032	G:A
348	66999	rs185680134	Intron 6	⁄	0.0002	0.121	A:G
349	67000	rs148589627	Intron 6	⁄	1	0.048	C:T
350	67023	rs372116953	Intron 6	⁄	0.048	0.073	G:A
351	67114	rs112835152	Intron 6	⁄	3.43e-06	0.121	G:A
352	67262	rs180944671	Intron 6	⁄	0.0013	0.137	A:G
353	67519	rs368943291	Intron 6	⁄	0.0013	0.137	A:C
354	67606	rs4445573	Intron 6	⁄	1	0.056	C:T
355	67682	rs139766851	Intron 6	⁄	0.0004	0.032	C:T
356	67683	rs143652122	Intron 6	⁄	0.012	0.194	G:A
357	68077	rs77961690	Intron 6	⁄	0.0273	0.065	G:C
358	68601	Novel.53	Intron 6	⁄	1	0.048	T:C
359	68756	Novel.54	Intron 6	⁄	1	0.008	T:G
360	68822	rs4917612	Intron 6	⁄	0.012	0.194	C:G
361	69682	rs11188090	Intron 6	⁄	0.1606	0.04	A:G
362	70273	rs80042589	Intron 6	⁄	0.0273	0.065	C:A
363	70757	rs12258243	Intron 6	⁄	1	0.032	T:A
364	70834	rs191279768	Intron 6	⁄	1	0.016	C:T
365	71195	Novel.55	Intron 6	⁄	1	0.008	C:G
366	72228	rs11188091	Intron 6	⁄	0.0041	0.234	G:A
367	72238	rs111406687	Intron 6	⁄	0.1697	0.097	C:T
368	72961	Novel.56	Intron 6	⁄	0.536	0.073	C:T
369	73056	rs114429727	Intron 6	⁄	0.0139	0.056	T:C
370	73464	Novel.57	Intron 6	⁄	1	0.008	G:A
371	73504	rs2093435	Intron 6	⁄	3.01e-18	0.387	C:T
372	73703	rs10882498	Intron 6	⁄	0.0162	0.226	T:A
373	73950	rs74154111	Intron 6	⁄	0.0139	0.056	G:A
374	73974	rs112151434	Intron 6	⁄	0.0777	0.081	G:A
375	74021	rs113461058	Intron 6	⁄	0.0055	0.153	C:T
376	74179	rs111732980	Intron 6	⁄	0.1697	0.097	C:G
377	74288	rs142070501	Intron 6	⁄	0.0028	0.145	C:G
378	74624	rs183106689	Intron 6	⁄	1	0.008	G:T
379	75099	rs187097857	Intron 6	⁄	1	0.008	G:T
380	75249	rs146859028	Intron 6	⁄	0.0273	0.065	C:T
381	75289	rs11188092	Intron 6	⁄	1	0.032	A:C
382	75854	rs112194017	Intron 6	⁄	0.2339	0.105	C:T
383	75977	rs11528090	Intron 6	⁄	0.0208	0.202	T:G
384	76021	rs138068662	Intron 6	⁄	0.0139	0.056	A:T
385	76353	rs74154112	Intron 6	⁄	0.0028	0.145	A:G
386	76815	rs7911654	Intron 6	⁄	1	0.056	A:G
387	77048	rs7915414	Intron 6	⁄	6.32e-07	0.355	G:A
388	77211	rs11498525	Intron 6	⁄	0.0344	0.21	G:A
389	77227	rs11188093	Intron 6	⁄	0.0066	0.185	C:A
390	77299	rs77044967	Intron 6	⁄	0.0106	0.129	A:T
391	77661	rs146630622	Intron 6	⁄	0.1179	0.089	G:A
392	77785	rs115086520	Intron 6	⁄	3.6e-08	0.194	C:T
393	78193	rs12775283	Intron 6	⁄	1	0.048	C:T
394	78270	rs12416196	Intron 6	⁄	0.0972	0.032	C:T
395	78682	rs117756203	Intron 6	⁄	0.1697	0.097	G:A
396	79114	rs10748628	Intron 6	⁄	3.01e-18	0.387	C:T
397	79299	rs80136886	Intron 6	⁄	0.0066	0.185	C:T
398	79332	rs66883721	Intron 6	⁄	0.0012	0.194	A:G
399	79565	rs7076598	Intron 6	⁄	0.0777	0.081	G:A
400	79936	rs28399513	Intron 6	⁄	1	0.04	T:A
401	80160	rs3758580	exon 7	⁄	1	0.048	C:T
402	80161	rs3758581	exon 7	I331V	0.2339	0.105	G:A
403	80622	rs192778795	Intron7	⁄	1	0.008	T:A
404	80629	rs78431362	Intron7	⁄	0.3106	0.113	T:A
405	80952	rs11592737	Intron7	⁄	1	0.048	A:G
406	81033	rs368454738	Intron7	⁄	1	0.008	G:T
407	81283	rs78609324	Intron7	⁄	0.2339	0.105	T:C
408	81811	rs11597626	Intron7	⁄	1	0.04	C:G
409	82708	rs544743091	Intron7	⁄	1	0.008	A:G
410	82809	rs76919419	Intron7	⁄	0.048	0.073	G:A
411	82865	rs1555474	Intron7	⁄	0.0002	0.274	G:C
412	84048	rs190647049	Intron7	⁄	0.0139	0.056	A:G
413	84393	Novel.58	Intron7	⁄	1	0.008	G:T
414	84436	Novel.59	Intron7	⁄	1	0.016	A:T
415	84456	Novel.60	Intron7	⁄	1	0.016	C:T
416	84834	Novel.61	Intron7	⁄	1	0.008	C:T
417	84964	rs188972006	Intron7	⁄	0.0163	0.016	G:A
418	85000	rs192463311	Intron7	⁄	1	0.008	C:G
419	85027	rs141161414	Intron7	⁄	1	0.008	T:A
420	85214	rs144599632	Intron7	⁄	0.1697	0.097	C:G
421	85376	rs535323026	Intron7	⁄	1	0.008	A:G
422	85400	rs191490519	Intron7	⁄	0.6506	0.081	G:T
423	85753	rs185193180	Intron7	⁄	1	0.032	C:T
424	85802	rs371400055	Intron7	⁄	0.1697	0.097	A:G
425	85947	rs201024784	Intron7	⁄	0.0139	0.056	A:G
426	85999	rs529011897	Intron7	⁄	1	0.008	T:C
427	86073	Novel.62	Intron7	⁄	1	0.008	A:G
428	86087	rs138507469	Intron7	⁄	0.0034	0.081	C:T
429	86602	rs1322181	Intron7	⁄	0.0274	0.234	G:A
430	86632	rs12098606	Intron7	⁄	1	0.056	A:T
431	86776	rs141510905	Intron7	⁄	0.0139	0.056	A:T
432	87106	rs4917623	Intron7	⁄	0.0004	0.21	T:C
433	87313	rs17886522	Exon 8	⁄	0.048	0.073	A:C
434	87594	rs17882572	Intron 8	⁄	0.0139	0.056	G:T
435	87620	rs17885052	Intron 8	⁄	0.0103	0.161	A:T
436	88055	rs1972341	Intron 8	⁄	3.01e-18	0.387	T:C
437	88110	Novel.63	Intron 8	⁄	1	0.008	C:G
438	88122	Novel.64	Intron 8	⁄	1	0.008	A:G
439	88123	Novel.65	Intron 8	⁄	1	0.016	A:G
440	88132	rs11188097	Intron 8	⁄	1	0.008	C:T
441	88166	rs17878627	Intron 8	⁄	0.2339	0.105	C:G
442	88169	rs17878382	Intron 8	⁄	0.2339	0.105	T:C
443	88715	rs76828799	Intron 8	⁄	0.1697	0.097	C:T
444	89166	rs35739901	Intron 8	⁄	1	0.04	T:C
445	89372	rs4617515	Intron 8	⁄	0.0025	0.202	G:A
446	89578	rs12779363	Intron 8	⁄	1	0.04	G:A
447	89909	rs12268020	Intron 8	⁄	1	0.04	C:T
448	90647	rs191493794	3'	⁄	1	0.008	C:T
449	91473	rs142519224	3'	⁄	0.0139	0.056	C:G
